# Supplementary material for: Legume-Derived Bioactive Peptides in Type 2 Diabetes: Opportunities and Challenges
Source: MDPI journal article supplement (doi:10.3390/nu15051096), 2023-02-22
Supplement: s1 [file s1]

**Table S1** Hydrolytic fractions from legume targeting  $\alpha$ -amylase,  $\alpha$ -glucosidase and DPP-4

| Source                 | Fraction                       | MW(KDa)                          | Inhibition index (IC50, %) |                                |                       | Reference |
|------------------------|--------------------------------|----------------------------------|----------------------------|--------------------------------|-----------------------|-----------|
|                        |                                |                                  | $\alpha$ -amylase          | $\alpha$ -glucosidase          | DPP-4                 |           |
| Pinto bean             | Protamex fraction              | < 3.0                            | 62.10 $\pm$ 3.49%          |                                |                       | [111]     |
|                        | Bromelain fraction             | < 1.0                            | 49.90 $\pm$ 1.40%          |                                |                       | [66]      |
|                        | Alcalase fraction              | < 1.0                            | /                          | 76.40 $\pm$ 0.50%              | 55.30 $\pm$ 1.60%     |           |
| Cowpea                 | Alcalase fraction              | > 10.0                           | 31.58 mg/mL                | 0.63 mg/mL                     |                       | [104]     |
|                        | Pepsin-pancreatin fraction     | < 1.0                            | 40.17 mg/mL                | 189.04 mg/mL                   |                       |           |
|                        | Alcalase hydrolysate           | /                                |                            |                                | 0.58 mg SP/mL         |           |
| Chickpea               | Bromelain hydrolysate          | /                                | 11.00 $\pm$ 0.80%          |                                | 790.00 $\mu$ g/mL     | [99]      |
|                        | Pepsin-pancreatin hydrolysate  | /                                | 38.40 $\pm$ 1.40%          |                                | 245.00 $\mu$ g/mL     |           |
|                        | Bambara bean                   | Alcalase/thermolysin hydrolysate | /                          |                                |                       |           |
| Lupin bean             | Hydrolysate (5 mg/mL)          | 0.4-0.9                          |                            |                                | 100%                  | [64]      |
| Black bean             | Alcalase fraction              | /                                | 53.40%                     | 66.10%                         | 96.70%                | [95]      |
| Navy bean              | Hydrolysate                    | 0.5-3.0                          | 31.00%                     | > 60.00%                       | 0.10 mg/mL            | [101]     |
| Red bean               | Hydrolysate                    | 0.5-3.0                          | 36.00%                     | > 60.00%                       |                       | [101]     |
| Fermented bean seed    | Hydrolysate                    | 3.5-7.0                          | 0.04-0.65 $\mu$ g/mL       |                                |                       | [94]      |
| Common bean            | Hydrolysate                    | /                                |                            | 46.90-50.10%                   | 0.14-0.33 mg/mL       | [98]      |
|                        | Non-hydrolyzed                 | /                                |                            |                                | 1.20 mg SP/mL         | [76]      |
| Germinated Common bean | Hydrolysate                    | /                                | 7.61-30.88%                |                                |                       | [76]      |
| Soybean                | Hydrolysate                    | /                                |                            | 0.05 mg/mL                     |                       | [62]      |
| Germinated soybean     | Pepsin and pancreatic fraction | /                                | 1.70 $\pm$ 0.18 mg/mL      | 2.90 $\pm$ 0.07 mg/mL(sucrase) | 1.49 $\pm$ 0.14 mg/mL | [61]      |
|                        |                                | > 10.0                           |                            |                                | 1.18 $\pm$ 0.15 mg/mL |           |
|                        |                                | 5.0-10.0                         |                            | 2.20 $\pm$ 0.40 mg/mL(sucrase) | 0.91 $\pm$ 0.17 mg/mL |           |
|                        |                                | < 5.0                            |                            | 1.23 $\pm$ 0.19 mg/mL(sucrase) |                       |           |
|                        |                                |                                  |                            |                                |                       |           |

SP: Soluble protein
